# Supplementary material for: Influence of viral infection on the relationships between airway cytokines and lung function in asthmatic children
Source: PubMed Central journal article supplement (PMC6249926; doi:10.1186/s12931-018-0922-9), 2018-11-21
Supplement: 12931_2018_922_MOESM3_ESM.pdf [file 12931_2018_922_MOESM3_ESM.pdf]

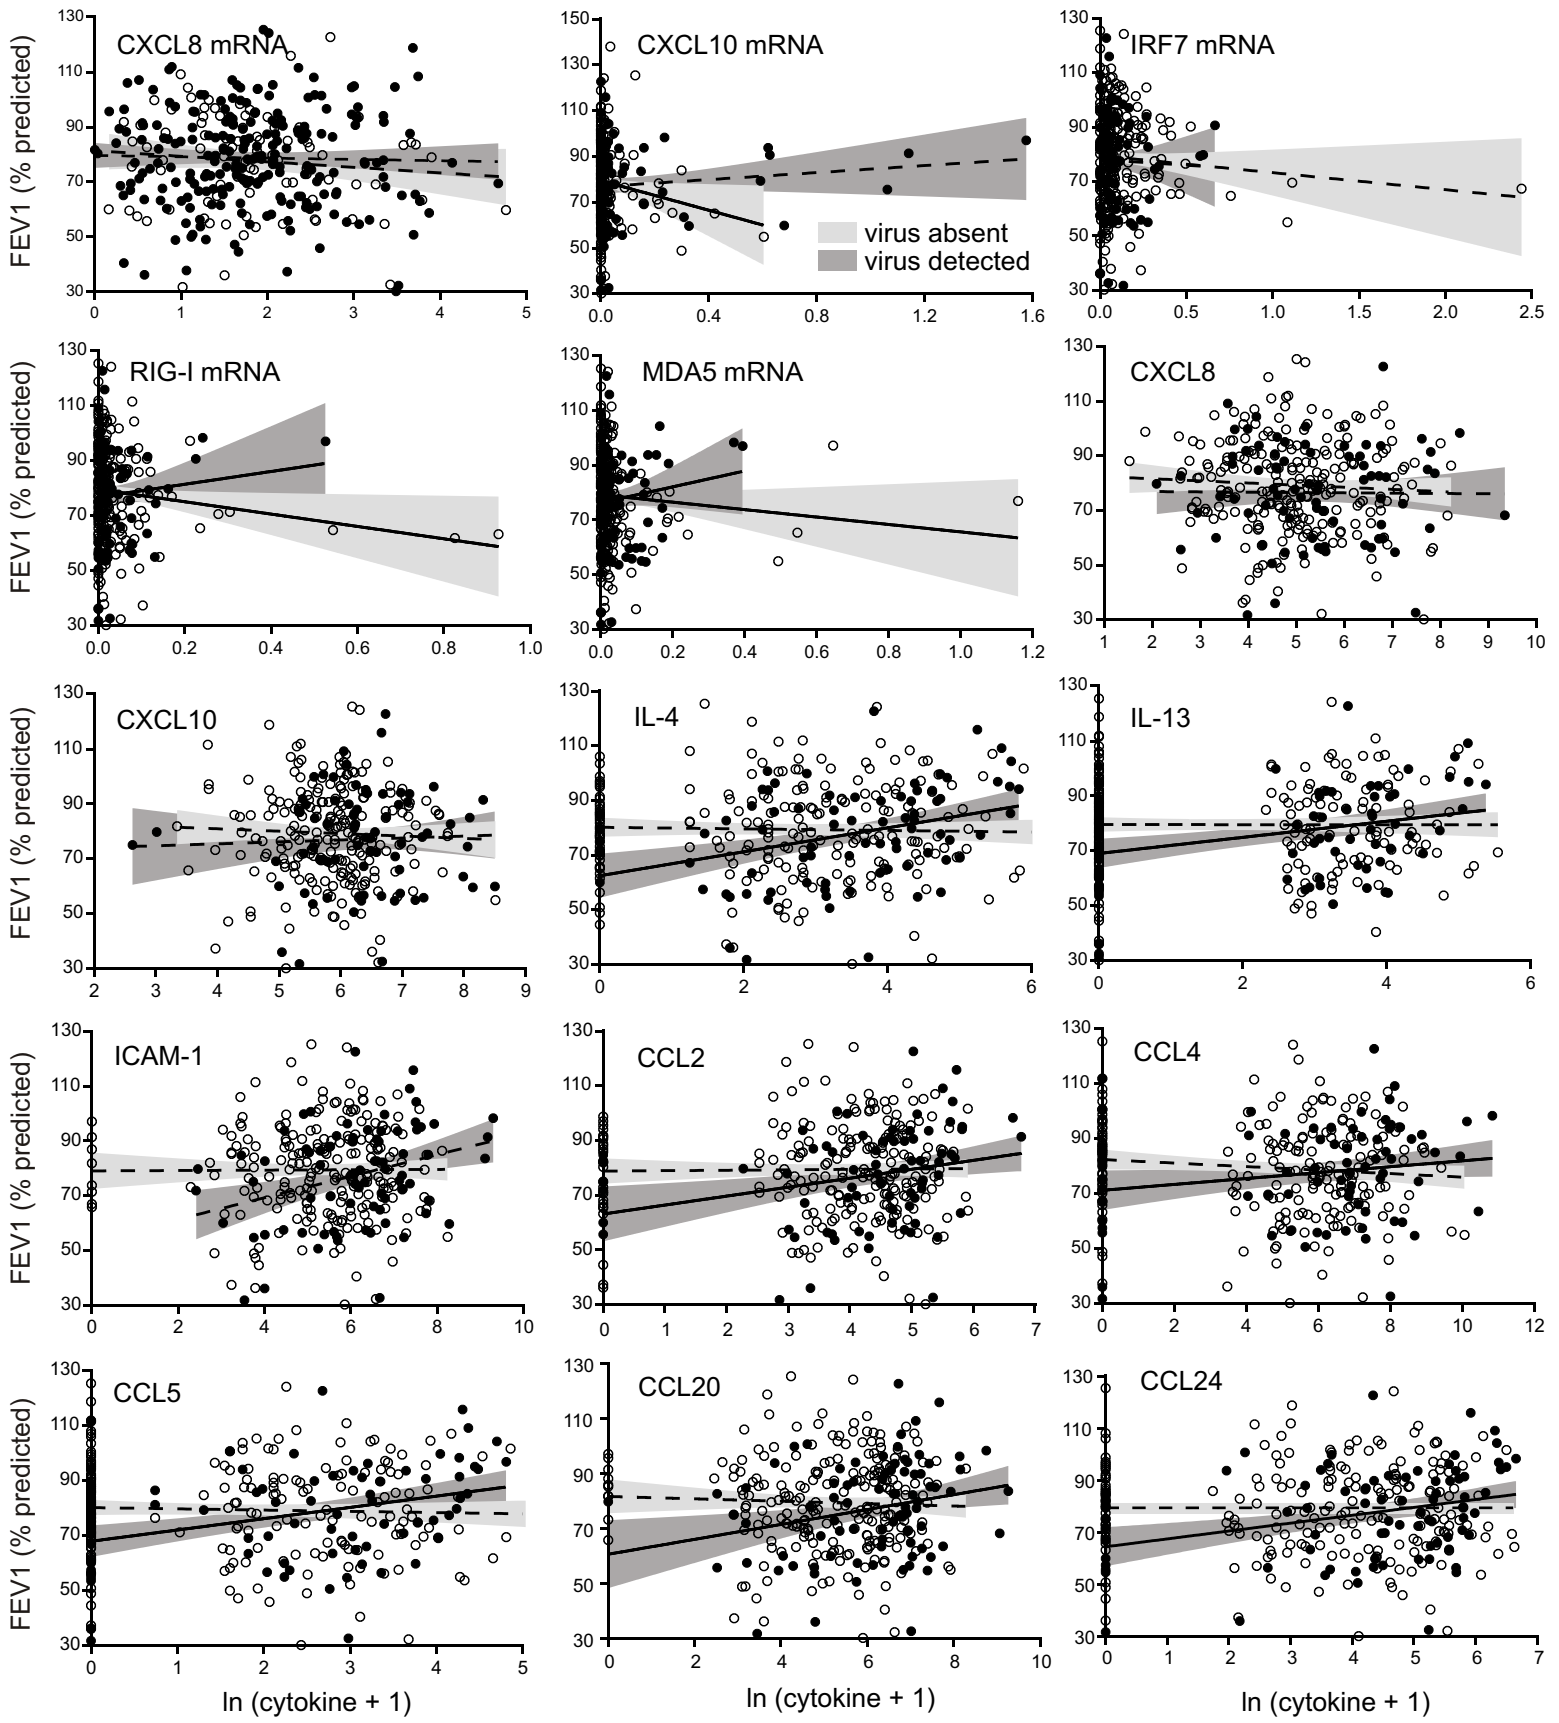

Figure S2
